# Supplementary material
Source: PubMed Central journal article supplement (PMC5883096)
Supplement: ajcr0008-0462-f7.pdf [file ajcr0008-0462-f7.pdf]

## HDAC5 promotes HCC by inhibiting Tap63-maspin

**Table S1.** Expression profiles of proliferation and apoptosis-related genes in Hep3B-shHDAC5 cells versus Hep3B-shCtrl cells.

| Gene   | shHDAC5/shCtrl         |                        | shHDAC5/shCtrl |              |
|--------|------------------------|------------------------|----------------|--------------|
|        | Result 1               | Result 2               | Result 1       | Result 2     |
|        | Fold Change            | Fold Change            | Log2 (FC)      | Log2 (FC)    |
|        | $2^{-\Delta\Delta Ct}$ | $2^{-\Delta\Delta Ct}$ |                |              |
| APAF1  | 0.780967               | 0.997692               | -0.356666507   | -0.003333589 |
| APEX1  | 0.718636               | 1.170129               | -0.476666886   | 0.226667587  |
| ATM    | 1.191958               | 1.41095                | 0.253333402    | 0.496666864  |
| ADGRB1 | 1.936341               | 0.512871               | 0.953333041    | -0.963332098 |
| BAX    | 3.899619               | 0.269184               | 1.963333177    | -1.893335435 |
| BBC3   | 1.378723               | 4.189177               | 0.463332633    | 2.066666842  |
| BCL2   | 4.573609               | 1.33484                | 2.193333034    | 0.416666824  |
| BID    | 0.825496               | 1.122462               | -0.27666687    | 0.166666605  |
| BNIP3  | 1.044877               | 1.025741               | 0.063333122    | 0.036666496  |
| BRCA1  | 0.837019               | 0.777367               | -0.256667723   | -0.36333223  |
| BRCA2  | 0.797377               | 1.170129               | -0.326666103   | 0.226667587  |
| BTG2   | 1.39797                | 1.632029               | 0.483333401    | 0.706666693  |
| CASP2  | 0.915945               | 1.122462               | -0.126667124   | 0.166666605  |
| CASP3  | 1.044877               | 0.868542               | 0.063333122    | -0.20333248  |
| CASP8  | 0.866537               | 1.194715               | -0.206666743   | 0.256666503  |
| CASP9  | 0.884745               | 1.162046               | -0.176666391   | 0.216667179  |
| CCNB1  | 0.775572               | 0.983957               | -0.366667375   | -0.023332825 |
| CCND1  | 0.62256                | 0.503025               | -0.683715209   | -0.991297992 |
| CCND3  | 1.242575               | 0.573024               | 0.313332933    | -0.80333253  |
| CCNG1  | 0.860551               | 1.162046               | -0.2166674     | 0.216667179  |
| CCNG2  | 5.709376               | 0.695763               | 2.513333076    | -0.523332135 |
| CD82   | 3.490256               | 1.470867               | 1.803332858    | 0.5566668    |
| CDK1   | 0.548412               | 0.680549               | -0.866667955   | -0.555229054 |
| CDC25A | 0.928731               | 1.084227               | -0.106667304   | 0.116666839  |
| CDC25C | 0.62996                | 0.614152               | -0.666667869   | -0.703332334 |
| CDK2   | 0.694157               | 0.77041                | -0.526666096   | -0.376301665 |
| CDK4   | 0.491862               | 0.650887               | -1.023674494   | -0.619520995 |
| CDK6   | 1.044877               | 1.401204               | 0.063333122    | 0.486667012  |
| CDKN1A | 0.915945               | 0.605697               | -0.126667124   | -0.723331829 |
| CDKN2A | 1.233992               | 0.80478                | 0.303333041    | -0.313333642 |
| CHEK1  | 0.890899               | 0.850667               | -0.16666621    | -0.233333606 |
| CHEK2  | 1.159364               | 1.138131               | 0.213333594    | 0.186666623  |
| CRADD  | 1.016305               | 0.97041                | 0.02333343     | -0.043333677 |
| DAPK1  | 1.757266               | 0.80478                | 0.813332591    | -0.313333642 |
| DDB2   | 0.903335               | 0.874583               | -0.146666987   | -0.193332789 |
| DDR1   | 2.537368               | 0.937355               | 1.343332772    | -0.093332558 |
| DNMT1  | 1.104454               | 1.874709               | 0.143333332    | 0.906666672  |
| E2F1   | 0.948246               | 1.401204               | -0.076666714   | 0.486667012  |
| E2F3   | 1.167428               | 0.95044                | 0.223333576    | -0.073332541 |
| EGR1   | 1.551144               | 1.940821               | 0.633332625    | 0.956667066  |
| EI24   | 0.749153               | 1.032876               | -0.416667704   | 0.046667065  |
| EP300  | 1.074252               | 1.316463               | 0.103332463    | 0.396666974  |
| ESR1   | 0.749153               | 0.997692               | -0.416667704   | -0.003333589 |
| FADD   | 0.837019               | 0.957051               | -0.256667723   | -0.063332289 |

## HDAC5 promotes HCC by inhibiting Tap63-maspin

|           |          |          |              |              |
|-----------|----------|----------|--------------|--------------|
| FAS       | 4.208578 | 0.345478 | 2.073332856  | -1.533334252 |
| FOXO3     | 1.225468 | 1.33484  | 0.293332812  | 0.416666824  |
| GADD45A   | 1.295342 | 1.401204 | 0.373333053  | 0.486667012  |
| HIF1A     | 0.659611 | 0.518064 | -0.600312637 | -0.94879776  |
| HSPB1     | 1.030492 | 1.32562  | 0.043333305  | 0.406667274  |
| IGFBP3    | 1.403935 | 0.294567 | 0.489476143  | -1.763332279 |
| JUN       | 1.54043  | 1.598443 | 0.623333125  | 0.676667299  |
| PIDD1     | 1.639588 | 1.643381 | 0.713333336  | 0.716666992  |
| MCL1      | 0.890899 | 1.30737  | -0.16666621  | 0.386667497  |
| MDM2      | 1.096825 | 1.271619 | 0.13333336   | 0.346666478  |
| MDM4      | 1.159364 | 1.32562  | 0.213333594  | 0.406667274  |
| MLH1      | 0.808507 | 0.676737 | -0.30666783  | -0.563332826 |
| MSH2      | 0.935191 | 0.777367 | -0.096667049 | -0.363332223 |
| MYC       | 1.259921 | 3.196885 | 0.333333276  | 1.676666848  |
| NF1       | 1.052145 | 1.170129 | 0.073333541  | 0.226667587  |
| CUL9      | 4.448543 | 0.502316 | 2.153332898  | -0.993332866 |
| PCNA      | 0.703847 | 0.844791 | -0.50666624  | -0.24333363  |
| PERP      | 1.143402 | 1.4914   | 0.193332719  | 0.576667247  |
| PMAIP1    | 3.792983 | 8.037055 | 1.923332906  | 3.006666955  |
| PPM1D     | 0.848704 | 1.047294 | -0.236666618 | 0.066666497  |
| PRC1      | 0.713672 | 0.983957 | -0.486666924 | -0.023332825 |
| PTEN      | 1.037659 | 1.178267 | 0.053332417  | 0.236666497  |
| RB1       | 0.854607 | 0.97716  | -0.226666961 | -0.033333287 |
| RCHY1     | 0.974905 | 1.054579 | -0.036666453 | 0.076667173  |
| RELA      | 1.35035  | 1.543994 | 0.433333391  | 0.626667146  |
| RPRM      | 1.104454 | 2.037312 | 0.143333332  | 1.026666936  |
| RRM2B     | 0.754364 | 0.97716  | -0.406667266 | -0.033333287 |
| SHISA5    | 1.685683 | 2.340257 | 0.753333257  | 1.226666971  |
| SERPINB5  | 4.868013 | 5.802469 | 2.283333021  | 2.53666691   |
| SERPINE1  | 0.786399 | 1.203025 | -0.346666608 | 0.266666623  |
| SESN1     | 0.733736 | 0.886792 | -0.446667024 | -0.17333234  |
| SESN3     | 0.634342 | 0.66281  | -0.656667228 | -0.593332726 |
| SFN       | 1.059463 | 1.211393 | 0.083333205  | 0.27666698   |
| SIRT1     | 2.255321 | 0.816015 | 1.173332787  | -0.293332423 |
| STAT1     | 0.848704 | 0.911723 | -0.236666618 | -0.133332524 |
| STEAP3    | 1.277509 | 1.940821 | 0.353333455  | 0.956667066  |
| THBS1     | 1.200248 | 1.271619 | 0.263332532  | 0.346666478  |
| TNF       | 1.54043  | 3.672257 | 0.623333125  | 1.876667028  |
| TNFRSF10A | 0.780967 | 1.084227 | -0.356666507 | 0.116666839  |
| TP53      | ND       | ND       | ND           | ND           |
| TP53BP2   | 0.689362 | 1.061914 | -0.53666632  | 0.086666933  |
| TP73      | 1.504454 | 1.684191 | 0.589239996  | 0.75205576   |
| TP63      | 2.996613 | 2.473694 | 1.583332778  | 1.306667048  |
| TSC2      | 0.831238 | 1.785919 | -0.266666486 | 0.836666649  |
| VCAN      | 0.928731 | 0.827406 | -0.106667304 | -0.273332675 |
| WT1       | 4.208578 | 2.292095 | 2.073332856  | 1.196666684  |
| XRCC4     | 1.183724 | 1.076738 | 0.243332738  | 0.106667245  |
| XRCC5     | 0.909618 | 0.880666 | -0.136667292 | -0.183333126 |
| GAPDH     | 1.341022 | 1.725084 | 0.423332905  | 0.786666613  |
